# Supplementary material for: Development of Stable Nano-Sized Transfersomes as a Rectal Colloid for Enhanced Delivery of Cannabidiol
Source: Pharmaceutics. 2022 Mar 25;14(4):703. doi: 10.3390/pharmaceutics14040703 (PMC9032849; doi:10.3390/pharmaceutics14040703)
Supplement: Supplementary file 1 [file pharmaceutics-14-00703-s001.zip › pharmaceutics-1639191-supplementary.pdf]

# Supplementary Materials: Development of Stable Nano-Sized Transfersomes as a Rectal Colloid for Enhanced Delivery of Cannabidiol

Thope Moqejwa, Thashree Marimuthu, Pierre P.D Kondiah and Yahya E. Choonara

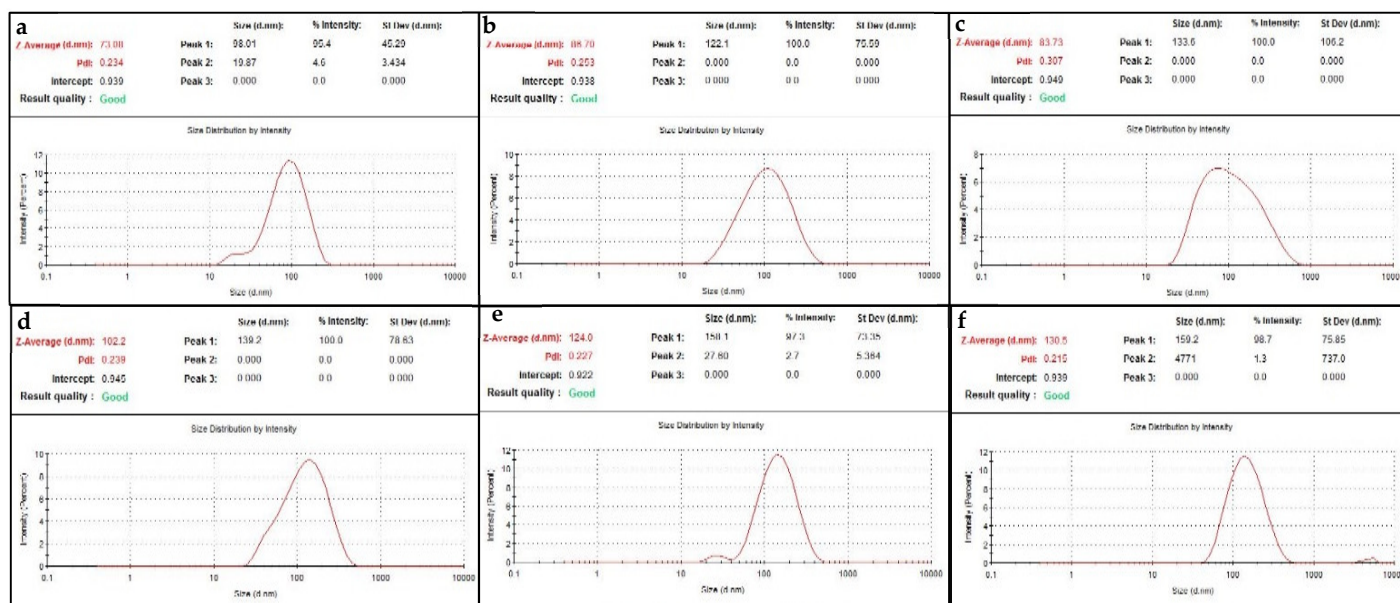

Figure S1. Size of non-lyophilised transfersomes colloid. (a) T1, (b) T2 (c) T3, (d) T4, (e) T5 and (f) T6.

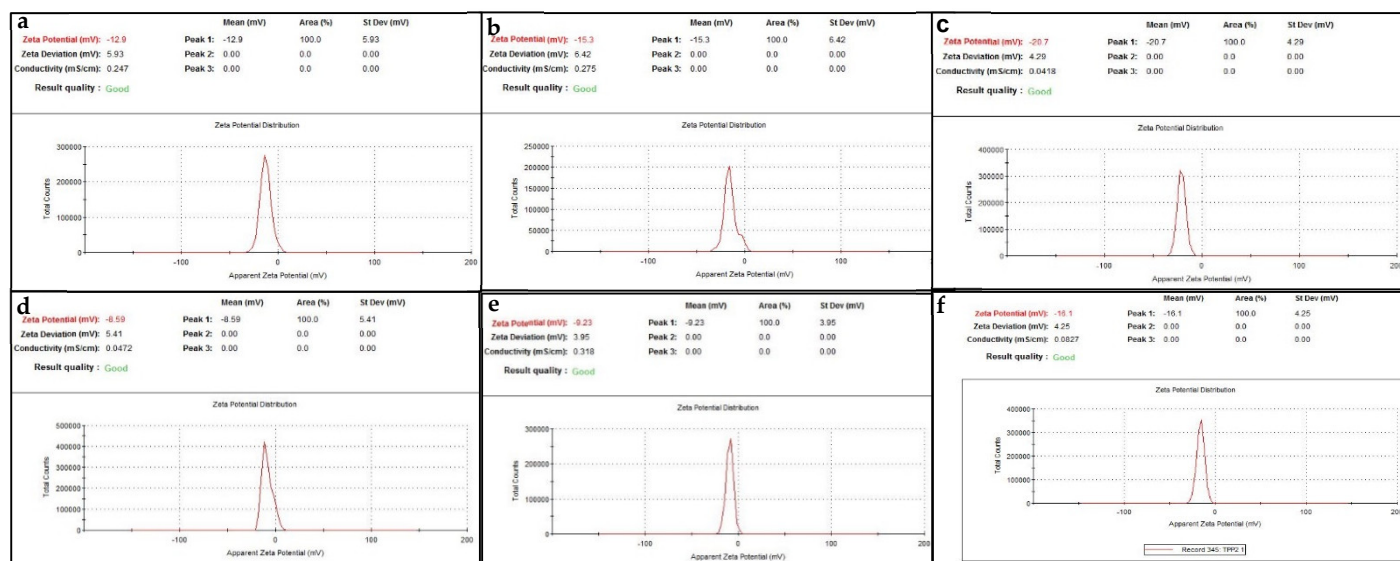

Figure S2. Zeta potential of non-lyophilized transfersomes colloid. (a) T1, (b) T2, (c) T3, (d) T4, (e) T5, and (f) T6

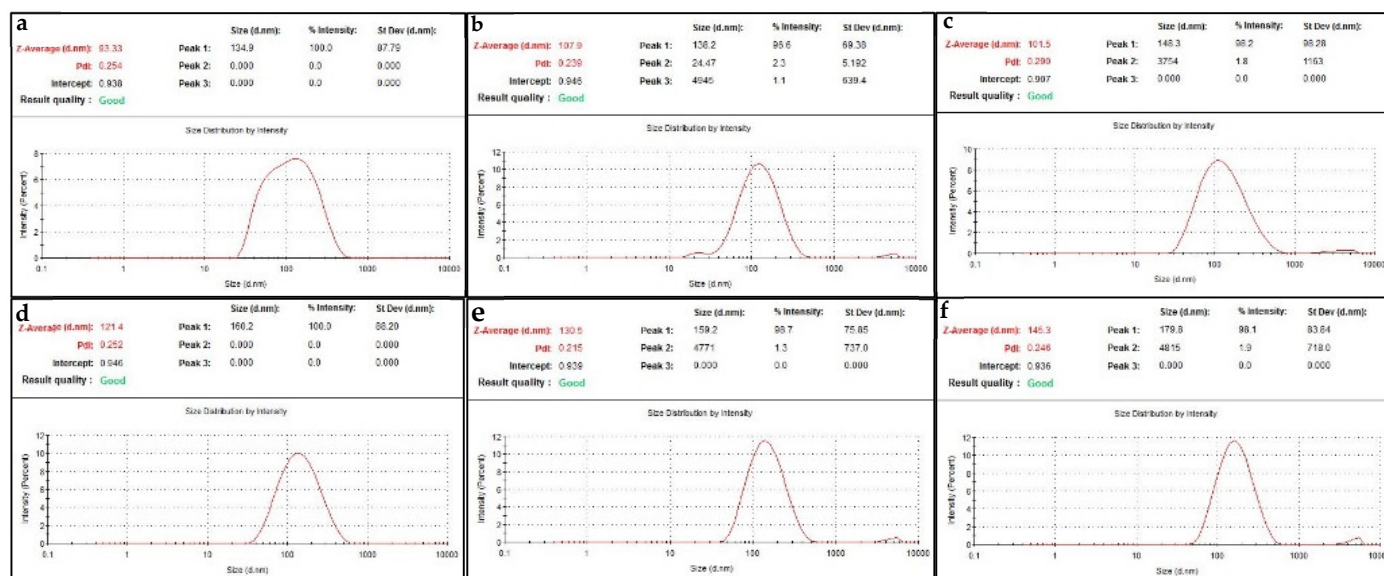

Figure S3. Size of lyophilized transfersomes colloid. (a) T1, (b) T2, (c) T3, (d) T4, (e) T5, and (f) T6.

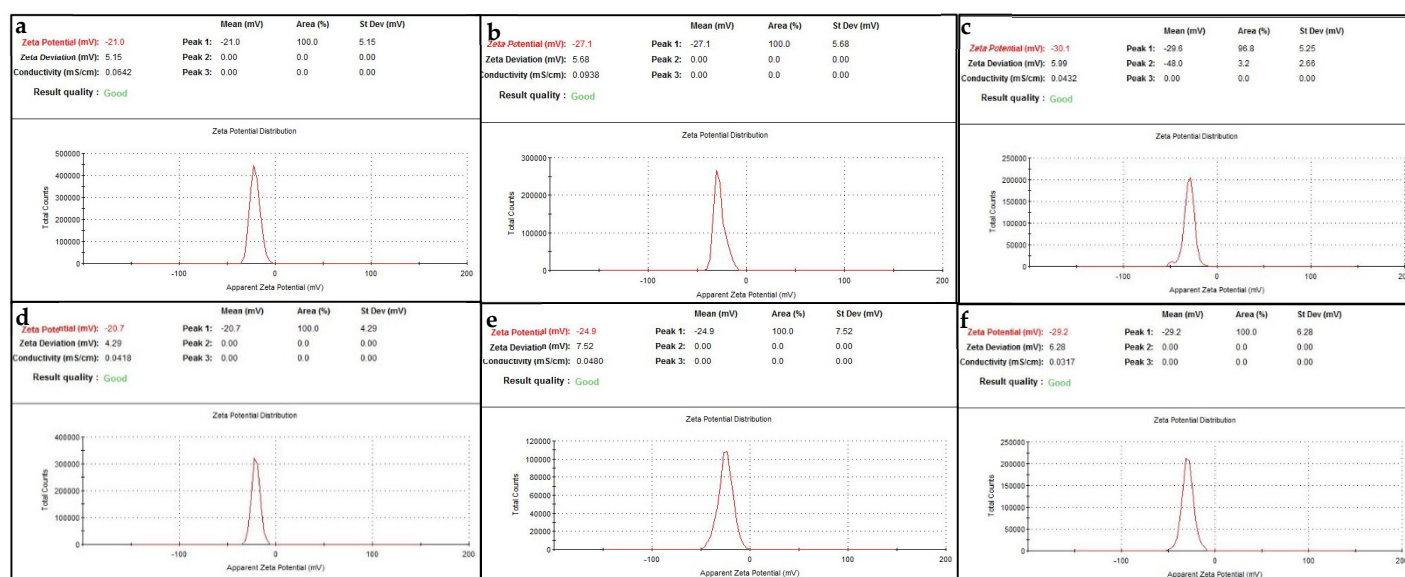

Figure S4. Zeta potential of lyophilized transfersomes colloid. (a) T1, (b) T2 (c) T3 (d) T4, (e) T5 and (f) T6.
